# Supplementary material for: Crystal structures and growth mechanisms of octahedral and decahedral Au@Ag core-shell nanocrystals prepared by a two-step reduction method
Source: Royal Society of Chemistry journal article supplement (doi:10.1039/c2ce25569c), 2012-01-01
Supplement: c2ce25569c.pdf [file c2ce25569c.pdf]

## Supplementary Information

### **Crystal structures and growth mechanisms of octahedral and decahedral Au@Ag core-shell nanocrystals prepared by a two-step reduction method**

**Masaharu Tsuji,<sup>\*a,b</sup> Nozomi Nakamura,<sup>b</sup> Masatoshi Ogino,<sup>b</sup> Koji Ikedo<sup>b</sup> and Mika Matsunaga<sup>a</sup>**

<sup>a</sup> *Institute for Materials Chemistry and Engineering, Kyushu University, Kasuga 816-8580, Japan*

<sup>b</sup> *Graduate School of Engineering Sciences, Kyushu University, Kasuga 816-8580, Japan*

<sup>\*</sup>To whom correspondence should be addressed: E-mail: [tsuji@cm.kyushu-u.ac.jp](mailto:tsuji@cm.kyushu-u.ac.jp)

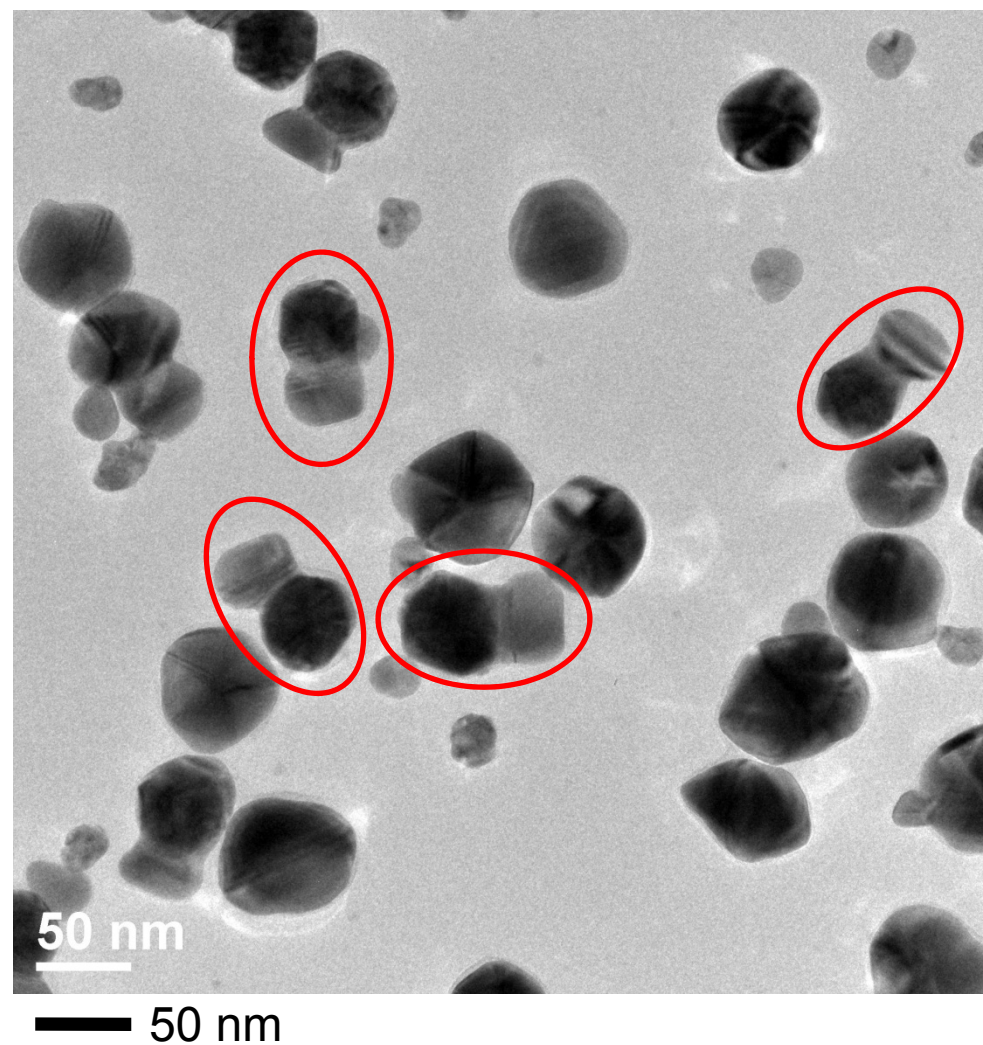

**Fig. S1.** TEM image of decahedral Au@Ag nanocrystals prepared under MW heating at an  $[\text{Ag}]/[\text{Au}]$  atomic ratio of 7. Twin particles formed from icosahedral Au cores are shown by red circles.
